# Supplementary material for: Selective hydrogenation of phenylacetylene over TiO2 supported Ni2P nanoparticles under visible light irradiation
Source: Royal Society of Chemistry journal article supplement (doi:10.1039/d3cy01093g), 2023-01-01
Supplement: d3cy01093g1.pdf [file d3cy01093g1.pdf]

## Supporting Information

### **Selective hydrogenation of phenylacetylene over TiO<sub>2</sub> supported Ni<sub>2</sub>P nanoparticles under visible light irradiation**

Xincheng Li,<sup>a,b</sup> Ruiyi Wang,<sup>a\*</sup> Jin Zhang,<sup>c</sup> Jing Wang,<sup>a,b</sup> Yunwei Wang<sup>a\*</sup> and Zhanfeng Zheng<sup>a,b\*</sup>

<sup>a</sup> *State Key Laboratory of Coal Conversion, Institute of Coal Chemistry, Chinese Academy of Sciences, Taiyuan 030001, PR China*

<sup>b</sup> *Center of Materials Science and Optoelectronics Engineering, University of Chinese Academy of Sciences, Beijing 100049, China.*

<sup>c</sup> *.Shanxi Institute of Science and Technology, Jincheng 048000, China*

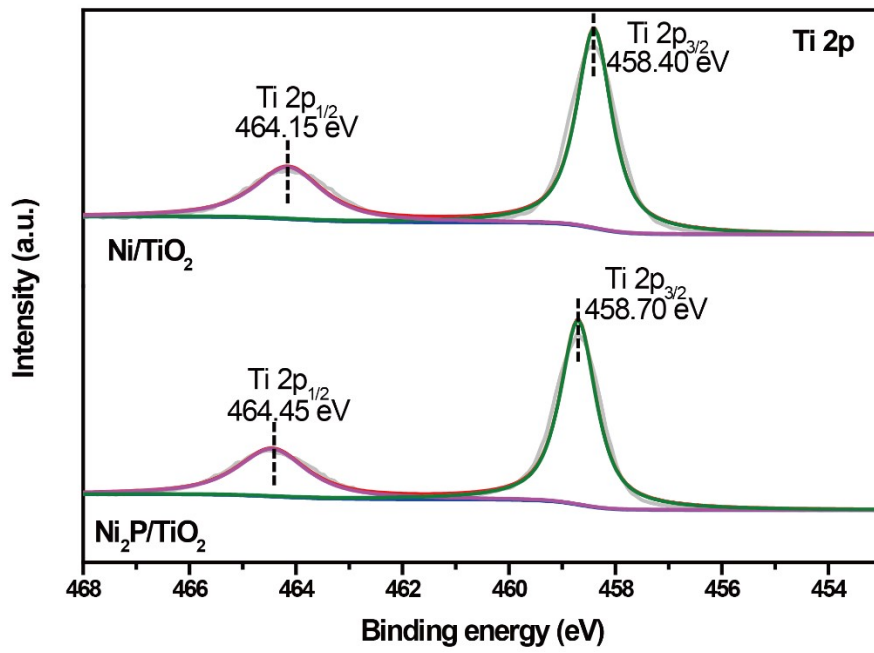

Fig. S1 High-resolution XPS Ni 2p of Ni<sub>2</sub>P/TiO<sub>2</sub> and Ni/TiO<sub>2</sub>

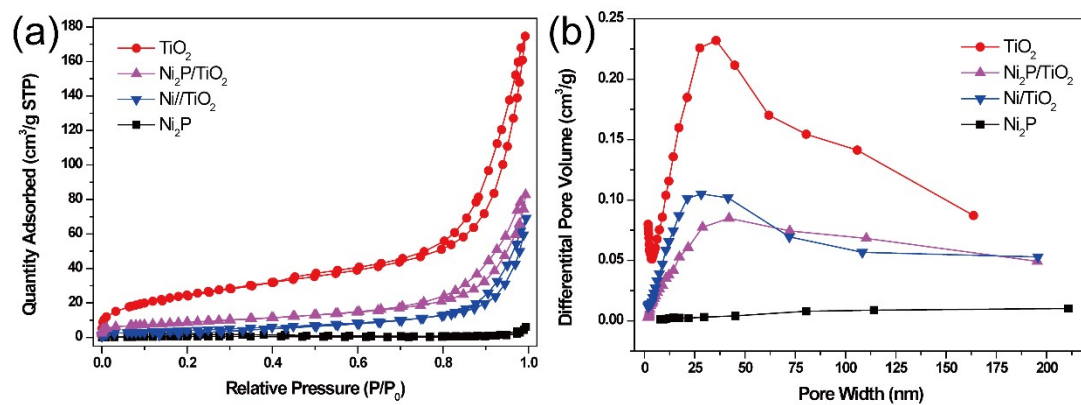

Fig. S2 (a)  $\text{N}_2$  sorption isotherms and the (b) corresponding pore size distribution curves of the prepared catalysts.

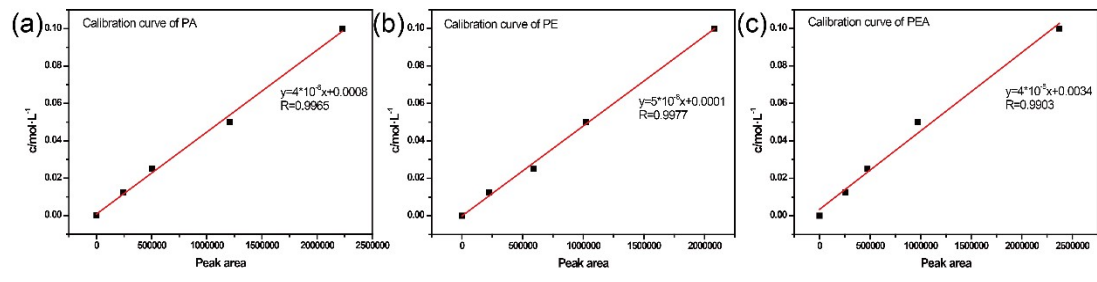

Fig. S3 Standard curves of PA, PE and PEA were plotted using the external standard method.

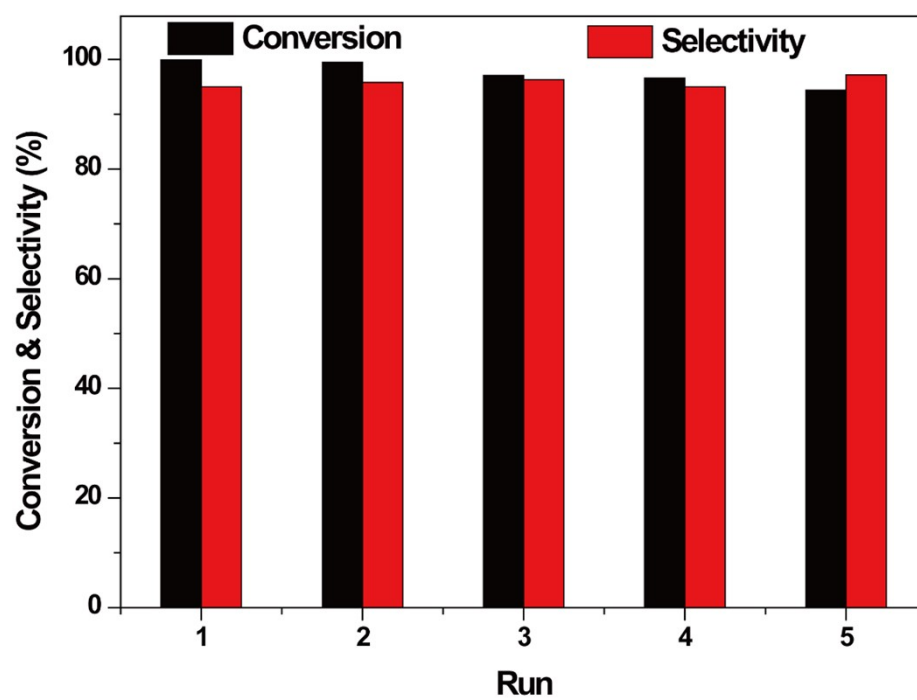

**Fig. S4** Reuses of the Ni<sub>2</sub>P/TiO<sub>2</sub>(R) photocatalyst in selective hydrogenation of PA.  
Reaction conditions: 20 mg catalyst, 0.1 mmol PA, 2 mL i-PrOH, 12 h, 80 °C, 1 atm H<sub>2</sub>, 0.5W/cm<sup>2</sup>LED white.

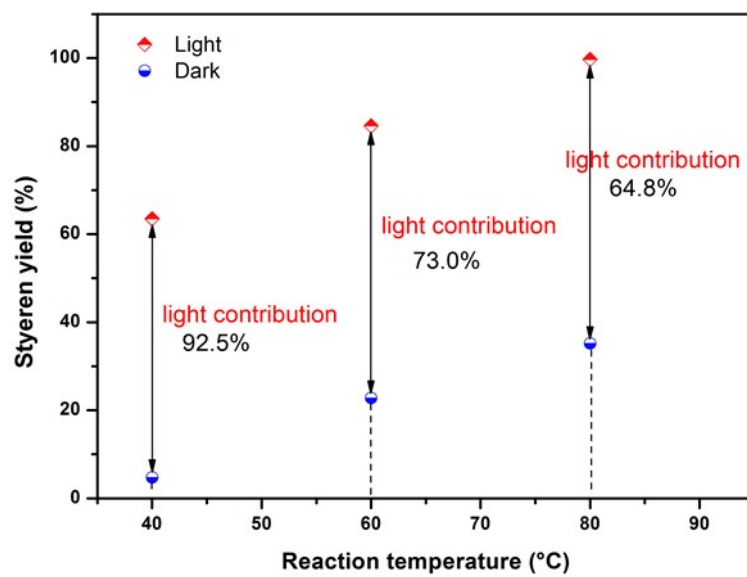

**Fig. S5** Photocatalytic performance at different temperatures. Reaction conditions: 20 mg Ni<sub>2</sub>P/TiO<sub>2</sub> catalyst, 0.1 mmol phenylacetylene, 2 mL, i-PrOH, 12 h, 80 °C, 1 atm H<sub>2</sub>, LED white light (0.5 W cm<sup>-2</sup>) or dark.

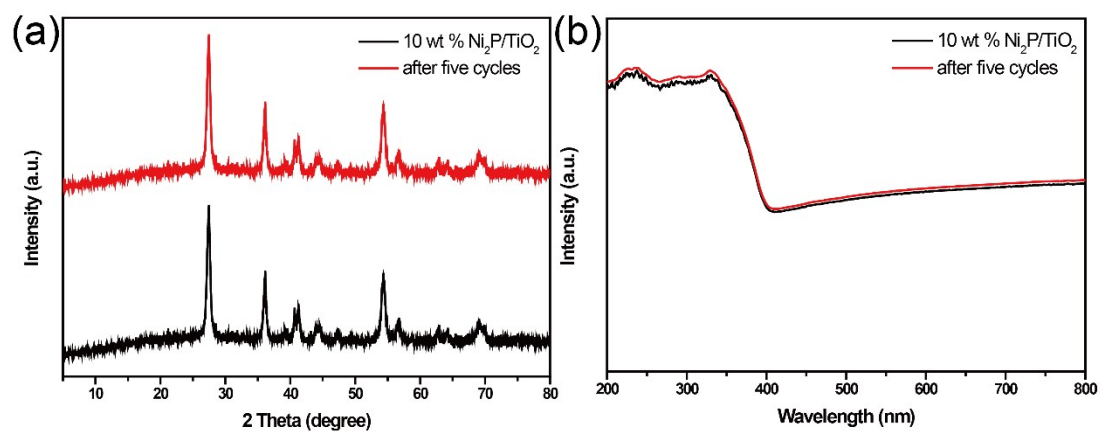

**Fig. S6** The XRD (a) and UV-Vis DRS of fresh and recycled Ni<sub>2</sub>P/TiO<sub>2</sub> catalyst.

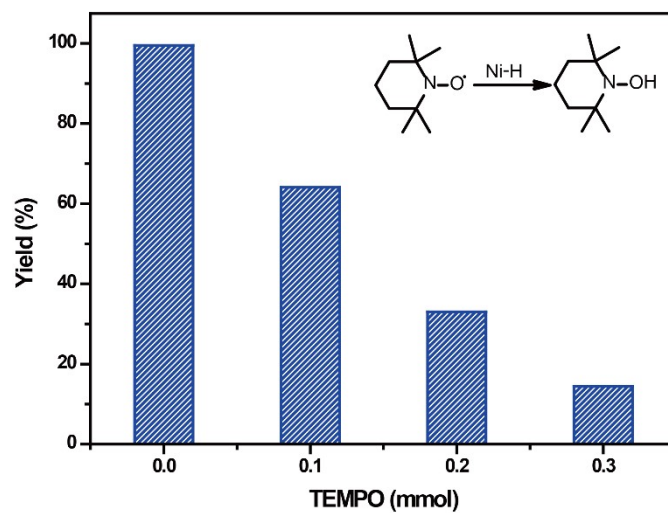

**Fig. S7** Effect of TEMPO as the hydrogen abstractor on the catalytic activity for selective hydrogenation of phenylacetylene. Reaction conditions: 20 mg Ni<sub>2</sub>P/TiO<sub>2</sub>, 0.1 mmol phenylacetylene, 2 mL, i-PrOH, 12 h, 80 °C, 1 atm H<sub>2</sub>, LED white light (0.5 W cm<sup>-2</sup>).



**Table S1** The structural properties of various catalysts.

| Sample                             | $S_{\text{BET}}$ ( $\text{m}^2 \text{g}^{-1}$ ) | Pore volume ( $\text{cm}^3 \text{g}^{-1}$ ) | Average pore diameter (nm) |
|------------------------------------|-------------------------------------------------|---------------------------------------------|----------------------------|
| $\text{Ni}_2\text{P}$              | 1.7                                             | 0.01                                        | 51.6                       |
| $\text{Ni}_2\text{P}/\text{TiO}_2$ | 19.8                                            | 0.12                                        | 23.22                      |
| $\text{Ni}/\text{TiO}_2$           | 15.3                                            | 0.11                                        | 20.59                      |
| $\text{TiO}_2$                     | 31.8                                            | 0.12                                        | 16.6                       |

**Table S2** The concentrations of PA, PE and PEA in the reaction system at different reaction times.

| Reaction time (h) | C <sub>PA</sub> (mmol) | C <sub>PE</sub> (mmol) | C <sub>PEA</sub> (mmol) | C <sub>all</sub> (mmol) |
|-------------------|------------------------|------------------------|-------------------------|-------------------------|
| 0                 | 0.0496                 | 0                      | 0                       | <b>0.0496</b>           |
| 1                 | 0.0400                 | 0.0060                 | 0.0035                  | <b>0.0495</b>           |
| 4                 | 0.0133                 | 0.0332                 | 0.0042                  | <b>0.0507</b>           |
| 8                 | 0.0008                 | 0.0371                 | 0.0127                  | <b>0.0506</b>           |
| 12                | 0                      | 0                      | 0.05223                 | <b>0.0483</b>           |

Reaction conditions: 20 mg Ni/TiO<sub>2</sub>, 0.1 mmol phenylacetylene, 2 mL, i-PrOH, 12 h, 80 °C, 1 atm H<sub>2</sub>, LED white light (0.5 W cm<sup>-2</sup>).

**Table S3** Effect of Ni<sub>2</sub>P loading on selective hydrogenation of PA.

| Entry | Ni <sub>2</sub> P loading (wt%) | Light source                   | Conv. (%) | Sel. (%) |
|-------|---------------------------------|--------------------------------|-----------|----------|
| 1     | 2                               | 0.5W/cm <sup>2</sup> LED white | 19.1      | 99.7     |
| 2     | 2                               | dark                           | 5.0       | 97.2     |
| 3     | 5                               | 0.5W/cm <sup>2</sup> LED white | 48.0      | 97.0     |
| 4     | 5                               | dark                           | 22.2      | 96.7     |
| 5     | 10                              | 0.5W/cm <sup>2</sup> LED white | 99.9      | 96.0     |
| 6     | 10                              | dark                           | 33.1      | 97.3     |
| 7     | 15                              | 0.5W/cm <sup>2</sup> LED white | 76.5      | 97.3     |
| 8     | 15                              | dark                           | 29.0      | 97.2     |

Reaction conditions: 20 mg catalyst, 0.1 mmol PA, 2 mL i-PrOH, 12 h, 80 °C, 1 atm H<sub>2</sub>.

**Table S4** The TiO<sub>2</sub> with different R value for selective hydrogenation of PA.

| Entry | R | Light Source                   | Conv. (%) | Sel. (%) |
|-------|---|--------------------------------|-----------|----------|
| 1     | 1 | 0.5W/cm <sup>2</sup> LED white | 46.2      | 97.5     |
| 2     | 1 | Dark                           | 23.2      | 97.3     |
| 3     | 3 | 0.5W/cm <sup>2</sup> LED white | 70.3      | 97.5     |
| 4     | 3 | Dark                           | 30.4      | 96.9     |
| 5     | 5 | 0.5W/cm <sup>2</sup> LED white | 99.9      | 96.0     |
| 6     | 5 | Dark                           | 33.1      | 97.3     |
| 7     | 7 | 0.5W/cm <sup>2</sup> LED white | 54.3      | 97.2     |
| 8     | 7 | Dark                           | 23.1      | 97.5     |

Reaction conditions: 20 mg catalyst, 0.1 mmol PA, 2 mL i-PrOH, 6 h, 80 °C, 1 atm H<sub>2</sub>.  
R=m(NaH<sub>2</sub>PO<sub>2</sub>):m(NiCl<sub>2</sub>·6H<sub>2</sub>O).

**Table S5** The Ni<sub>2</sub>P/TiO<sub>2</sub> photocatalyst selective hydrogenation of various alkynes.

| Entry | Product                                                                           | Light Source                          | Conv. (%) | Sel. (%) |
|-------|-----------------------------------------------------------------------------------|---------------------------------------|-----------|----------|
| 1     | 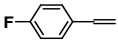 | 0.5W<br>white<br>cm <sup>-2</sup> LED | 97.4      | 99.0     |
| 2     |  | dark                                  | 27.5      | 99.5     |
| 3     |  | 0.5W/cm <sup>2</sup> LED<br>white     | 78.1      | 98.1     |
| 4     |  | dark                                  | 21.4      | 99.0     |
| 5     |  | 0.5W/cm <sup>2</sup> LED<br>white     | 13.4      | 99.5     |
| 6     |  | dark                                  | 1.7       | 98.3     |
| 7     |  | 0.5W/cm <sup>2</sup> LED<br>white     | 64.3      | 97.1     |
| 8     |  | dark                                  | 23.8      | 97.6     |

Reaction conditions: 20 mg catalyst, 0.1 mmol substrate, 2 mL i-PrOH, 12 h, 80 °C, 1 atm H<sub>2</sub>.

**Table S6** Photocatalytic activity over various catalysts for selective hydrogenation.

| Entry | Catalyst                                  | Conditions                                                          | Light and performance                                             | Ref.      |
|-------|-------------------------------------------|---------------------------------------------------------------------|-------------------------------------------------------------------|-----------|
|       |                                           |                                                                     | white LED, 0.5 W cm <sup>-2</sup>                                 |           |
| 1     | Ni <sub>2</sub> P/TiO <sub>2</sub>        | 80 °C, 12 h, 1 atm H <sub>2</sub> ,<br>2mL i-PrOH, 0.1 mmol PA      | Conv.=99.9%<br>Sel.=97.2%                                         | This work |
| 2     | Au/BT                                     | 25 °C, 2 h, 2 MPa H <sub>2</sub> , 2mL<br>ethanol, 4.42 mmol PA     | 1.0 W cm <sup>-2</sup><br>(λ≥400 nm)<br>Conv.=51.4%<br>Sel.=90.3% | 41        |
| 3     | Au@CeO <sub>2</sub>                       | 25 °C, 3h, 30 atm H <sub>2</sub> , 5 mL<br>toluene, 0.4 mmol PA     | -<br>Conv=99%<br>Sel.=98%                                         | 42        |
| 4     | Cu <sub>3</sub> Pd <sub>1</sub> /SN       | 25 °C, 1 h methanol 2 mL, , 1<br>atm H <sub>2</sub> , 0.1 mmol PA   | 300 W Xe lamp<br>(λ≥400 nm)<br>Conv.=99.6%<br>Sel.=99.4%          | 37        |
| 5     | Pd <sub>1</sub> /Ni@G                     | 25 °C, 1.25h, 2 bar H <sub>2</sub> , 10 mL<br>ethanol, 1.85 mmol PA | -<br>Conv.=100%<br>Sel.=93%                                       | 43        |
| 6     | H <sub>350</sub> Ni/COF                   | 100 °C, 1h, 1 Mpa H <sub>2</sub> , 0.4<br>mmol PA, 3 mL methanol    | -<br>Conv.=99%<br>Sel.=85%                                        | 44        |
| 7     | NiZn <sub>3</sub> /AISBA-15               | 40 °C, 15.5 h, 0.1 MPa, 4.5 g<br>PA, 90 g methanol                  | -<br>Conv.=99.6%<br>Sel.=90.3%                                    | 5         |
|       |                                           |                                                                     | white LED, 0.6 W cm <sup>-2</sup>                                 |           |
| 8     | Llysine/Ni/Nb <sub>2</sub> O <sub>5</sub> | 80 °C, 12 h, 1 atm H <sub>2</sub> ,<br>2mL i-PrOH 0.1 mmol PA       | Conv.=99.9%<br>Sel.=96.7%                                         | 39        |
| 9     | Ni–Ga IMCs                                | 50 °C, 5h 0.5 MPa H <sub>2</sub> ,<br>30 mL i-PrOH, 1.0 mL PA       | -<br>conv=95.1%<br>sel.=92.2%                                     | 45        |
| 10    | Ni <sub>2</sub> Si/SBA-15                 | 40 °C, 2h ,1.0 MPa H <sub>2</sub> , 10 mL<br>methanol, 1 mmol PA    | -<br>Conv.=81.5%<br>Sel.=91.5%                                    | 46        |
| 11    | Co/NC                                     | 120 °C, 2 h, 2 MPa H <sub>2</sub> , 100 μL<br>PA, 6 mL ethanol      | -<br>Conv.=88.7%<br>Sel.=91.2%                                    | 47        |

12

Fe/NC

120 °C, 2 h, 2 MPa H<sub>2</sub>, 100 μL  
PA, 6 mL ethanol

-  
Conv.=20.5%  
Sel.=82.2%

---

47
